# Supplementary material for: Effects of the i-motif DNA loop on the fluorescence of silver nanoclusters
Source: Royal Society of Chemistry journal article supplement (doi:10.1039/c5ra22489f), 2016-01-01
Supplement: c5ra22489f1.pdf [file c5ra22489f1.pdf]

## Electronic Supplementary Information

### Effects of I-Motif DNA Loop on the Fluorescence of Silver Nanoclusters

Taotao Li,<sup>a</sup> Nongyue He,<sup>ab</sup> Jiu hai Wang,<sup>a</sup> Song Li,<sup>b</sup> Yan Deng<sup>b</sup> and Zunliang Wang<sup>\*a</sup>

*a. State Key Laboratory of Bioelectronics, School of Biological Science and Medical Engineering, Southeast University, Si Pai Lou 2, Nanjing 210096, China.*

*b. Economical Forest Cultivation and Utilization of 2011 Collaborative Innovation Center in Hunan Province, Hunan Key Laboratory of Green Packaging and Biological Nanotechnology, Hunan University of Technology, Zhuzhou 412007, China.*

\*Corresponding author E-mail: [zunliang.wang@gmail.com](mailto:zunliang.wang@gmail.com); Tel: +86 25 83792245.

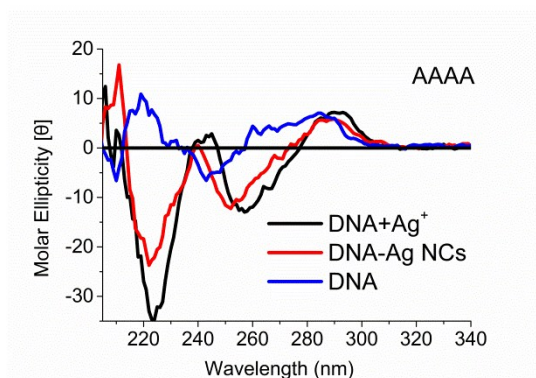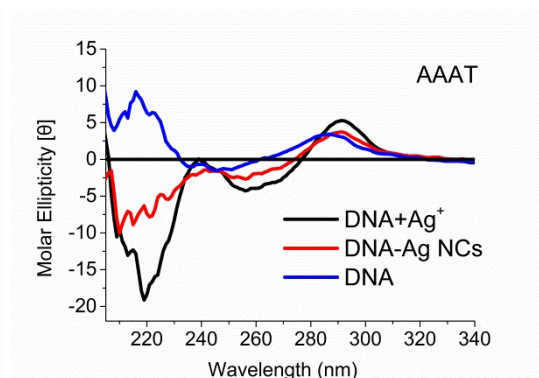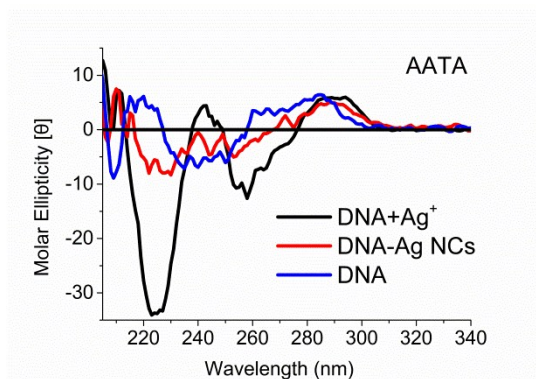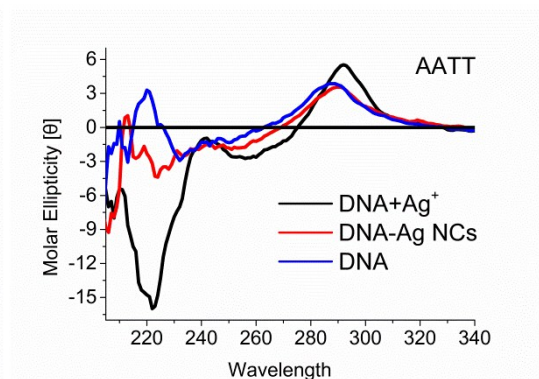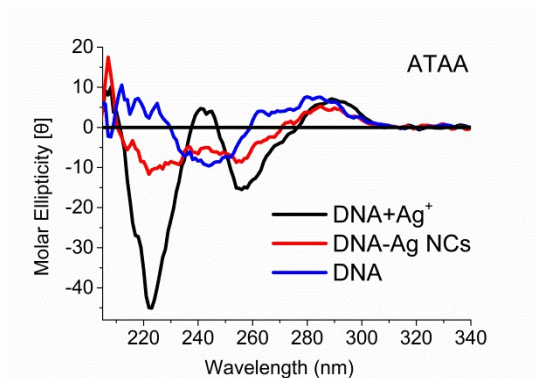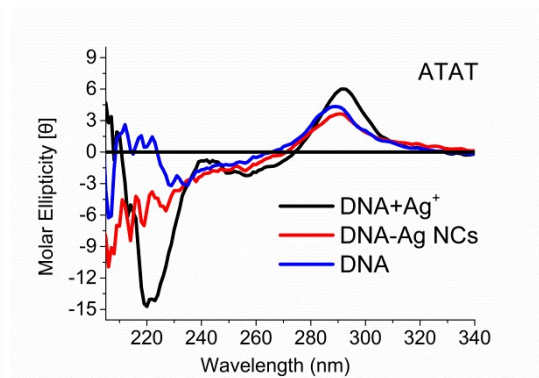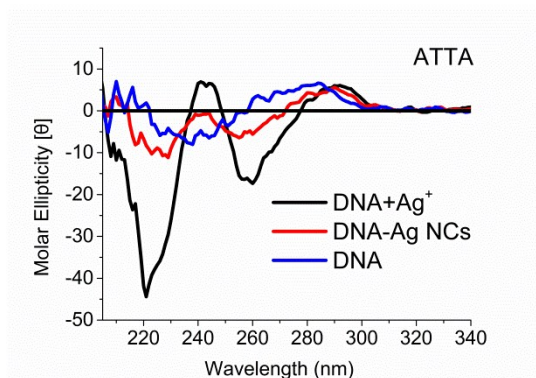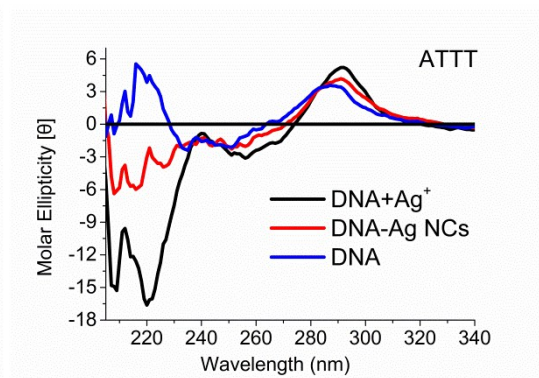

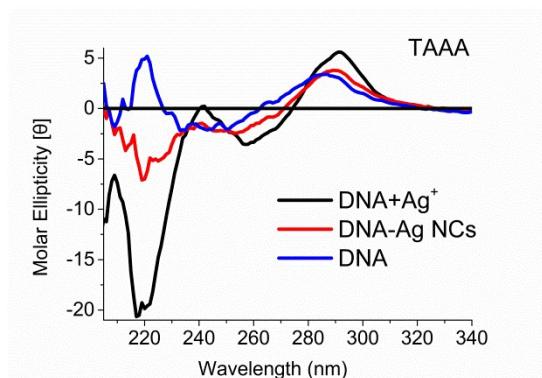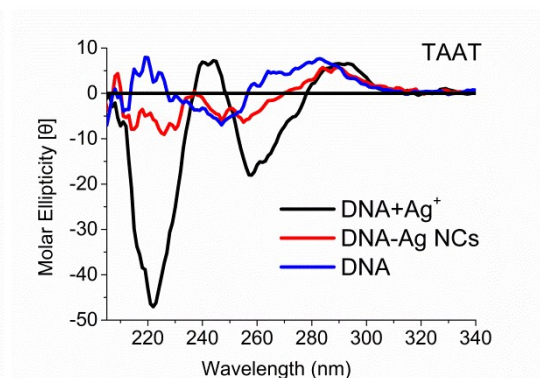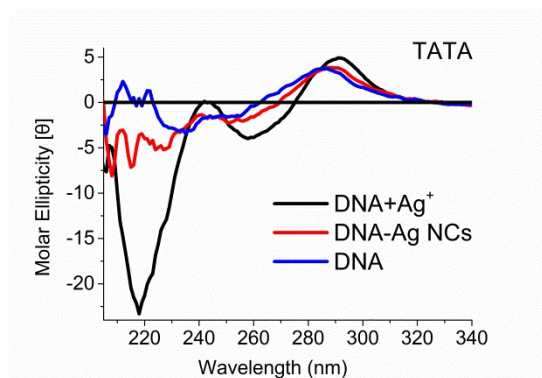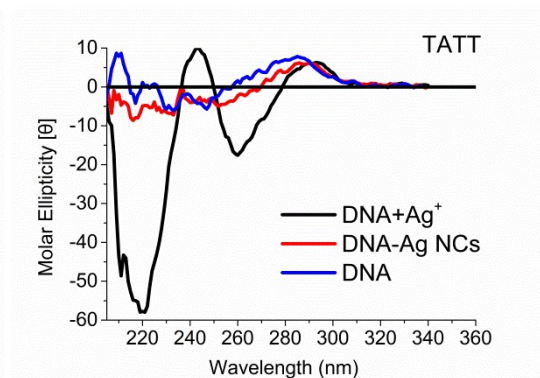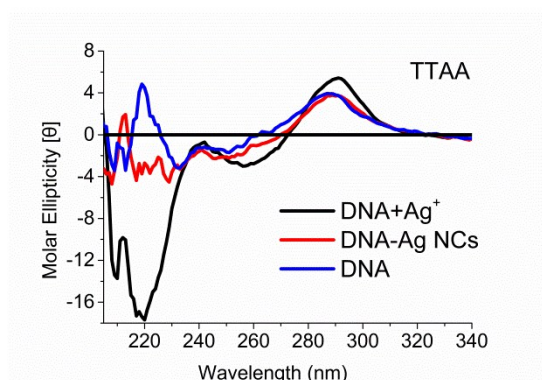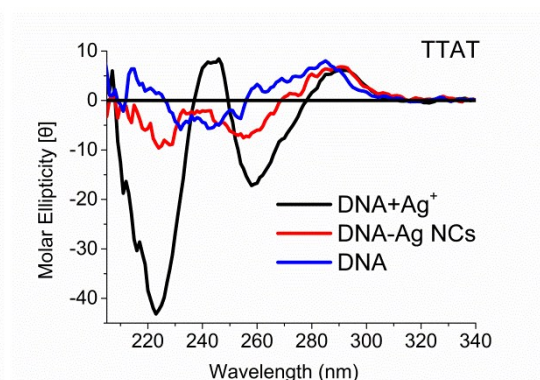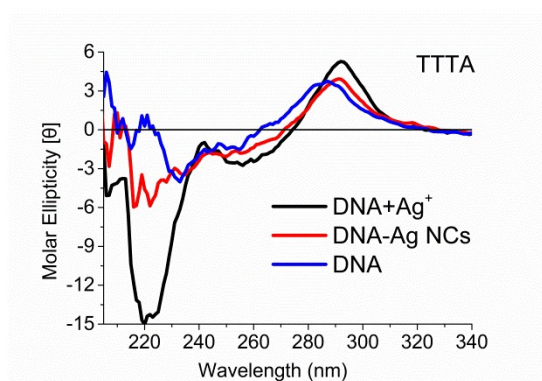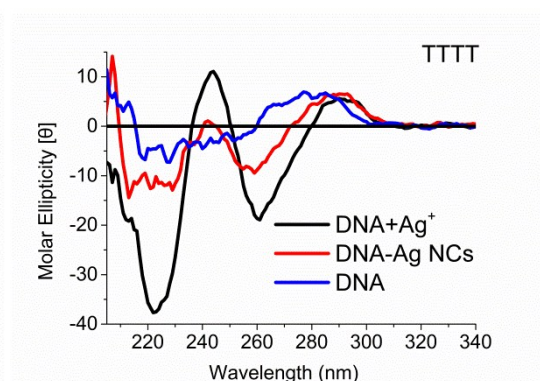



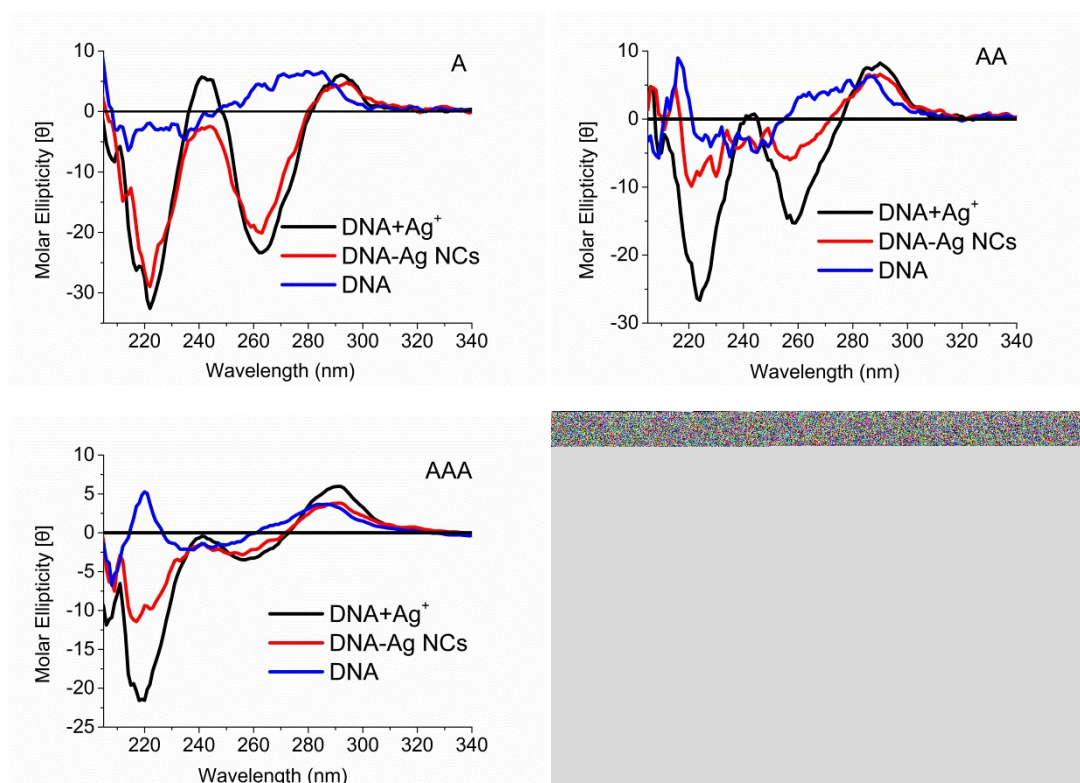

Fig. S1. The circular dichroism spectra of DNA+Ag<sup>+</sup> complex (black), DNA-Ag NCs (red) and pure DNA (blue) solution. All samples were dispersed in 20 mM PB buffer at pH 6.6.

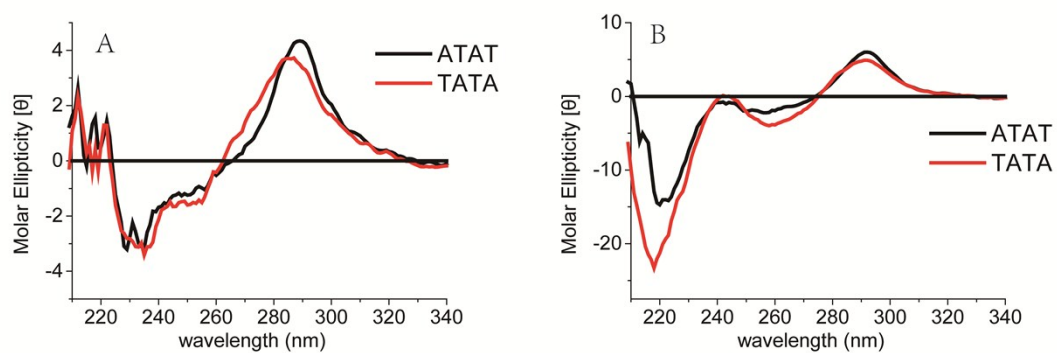

Fig. S2. The CD spectra of the DNA sequence C<sub>4</sub>-ATAT-C<sub>4</sub> (black) and C<sub>4</sub>-TATA-C<sub>4</sub> (red) (A) before and (B) after adding the Ag<sup>+</sup> ions.

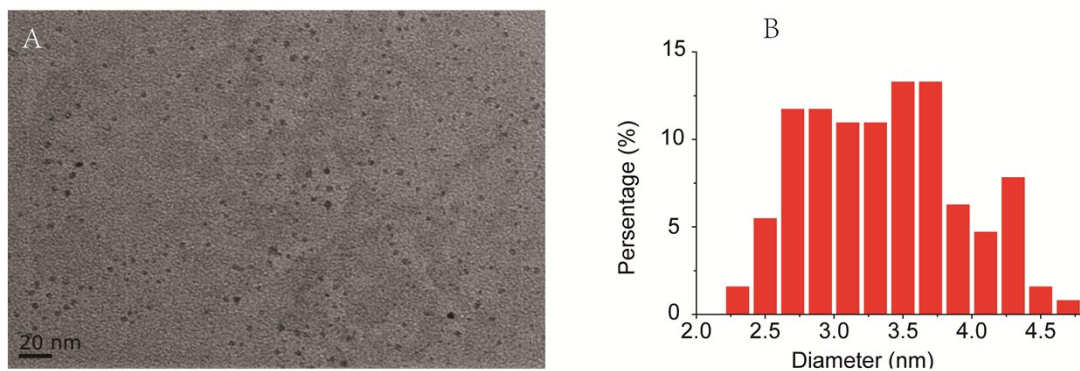

Fig. S3. The TEM image and size distribution histogram (B) of the Ag NCs stabilized by the DNA sequence C<sub>4</sub>-**TATA**-C<sub>4</sub>.

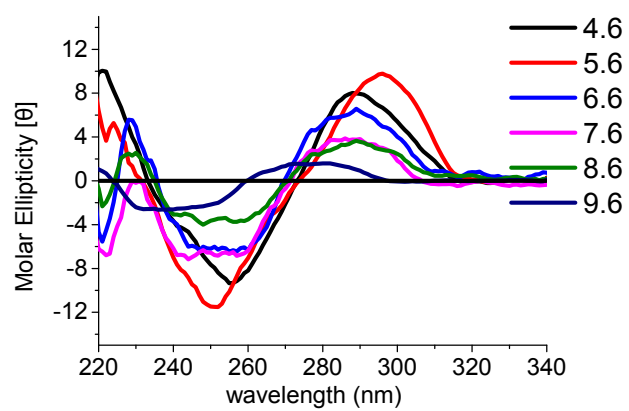

Fig. S4. The CD spectra of the sequence  $C_4$ -**ATAT**- $C_4$  under a wide pH values ranged from 4.6 to 9.6.

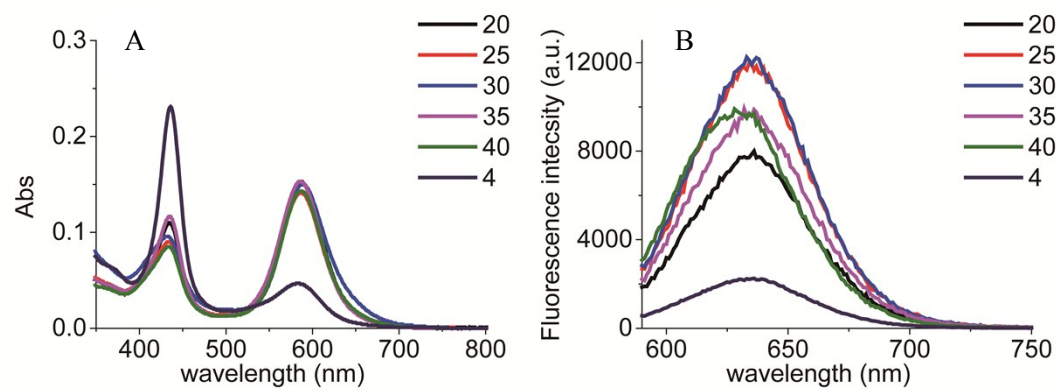

Fig. S5. (A) The UV adsorption spectrum and (B) fluorescence intensity of  $C_4$ -ATAT- $C_4$  stabilized Ag NCs as a function of temperature.
